# Supplementary material
Source: PubMed Central journal article supplement (PMC10992006)
Supplement: 262_2020_2668_MOESM1_ESM.pdf [file 262_2020_2668_MOESM1_ESM.pdf]

**A**

Patients (NSCLC, n=350) receiving ICI treatment with clinical data and mutational data from Samstein et al. of Memorial Sloan Kettering Cancer Center

Exclusion:  
 ■ Patients without genomic data  
 ■ Remove gene mutations with no more than 5% mutant cases

■ Eligible patients with clinical data and filtered mutations data for univariate Cox regression analysis (NSCLC, n=350)

■ P-value<0.05

■ Multivariate Cox analysis according to univariate Cox regression analysis (NSCLC, n=350)

**B**

TCGA-LUAD  
(collected within TCGA Biobank on R/Bioconductor and cBioPortal)

TCGA-LUSC  
(collected within TCGA Biobank on R/Bioconductor and cBioPortal)

Merged

TCGA-NSCLC

Exclusion:  
 ■ Genomic data was missing

Mutation data  
 ■ DNA damage response and repair (DDR)-related gene sets downloaded from the MSigDB database of Broad Institute) for analysis  
 ■ Tumor mutation burden data for anti-tumor immunity analysis

■ Neoantigen data for anti-tumor immunity analysis

Exclusion:  
 ■ Genomic data not attached gene expression data

Matched RNA-seq data for  
 ■ Gene Set Enrichment Analysis (GSEA)  
 ■ CIBERSORT algorithm  
 ■ Immune gene sets (collected from Thorsson et.al)

Exclusion:  
 ■ Neoantigen data was missing  
 ■ Genomic data was missing
