# Supplementary material
Source: PubMed Central journal article supplement (PMC10992006)

**A**

| Multivariate cox    |             | Sample(N) | Hazard ratio | HR (95CI%)        | p      |
|---------------------|-------------|-----------|--------------|-------------------|--------|
| <b>TMB Status</b>   | Low-TMB     | 258       | ■            | Reference         |        |
|                     | High-TMB    | 92        | ■            | 0.73 (0.48, 1.11) | 0.138  |
| <b>Drug Type</b>    | Combination | 21        | ■            | Reference         |        |
|                     | Monotherapy | 329       | ■            | 2.51 (1.27, 4.96) | 0.008  |
| <b>PBRM1 Status</b> | WT          | 332       | ■            | Reference         |        |
|                     | MT          | 18        | ■            | 2.81 (1.59, 4.95) | <0.001 |
| <b>ZFHX3 Status</b> | WT          | 323       | ■            | Reference         |        |
|                     | MT          | 27        | ■            | 0.35 (0.15, 0.82) | 0.015  |
| <b>NTRK3 Status</b> | WT          | 330       | ■            | Reference         |        |
|                     | MT          | 20        | ■            | 0.48 (0.21, 1.12) | 0.089  |
| <b>EPHA5 Status</b> | WT          | 321       | ■            | Reference         |        |
|                     | MT          | 29        | ■            | 0.73 (0.39, 1.39) | 0.340  |
| <b>EPHA7 Status</b> | WT          | 332       | ■            | Reference         |        |
|                     | MT          | 18        | ■            | 0.60 (0.24, 1.49) | 0.269  |
| <b>EPHA3 Status</b> | WT          | 313       | ■            | Reference         |        |
|                     | MT          | 37        | ■            | 0.74 (0.44, 1.24) | 0.251  |
| <b>MGA Status</b>   | WT          | 330       | ■            | Reference         |        |
|                     | MT          | 20        | ■            | 0.66 (0.32, 1.35) | 0.252  |
| <b>PTPRD Status</b> | WT          | 307       | ■            | Reference         |        |
|                     | MT          | 43        | ■            | 0.90 (0.55, 1.48) | 0.672  |

**B**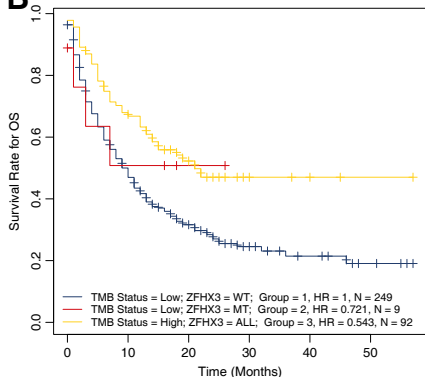**C**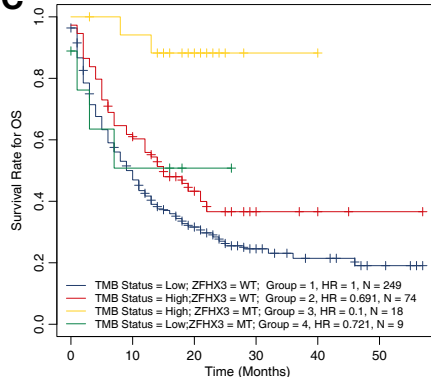**D**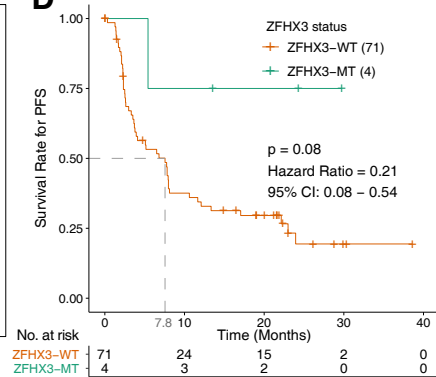

Supplement: 262_2020_2668_MOESM2_ESM.pdf [file 262_2020_2668_MOESM2_ESM.pdf]
