# Supplementary material
Source: PubMed Central journal article supplement (PMC10992006)
Supplement: 262_2020_2668_MOESM6_ESM.pdf [file 262_2020_2668_MOESM6_ESM.pdf]

Table S2. Comparison of gene mutations (top20) between the ZFHX3-MT and ZFHX3-WT tumors in the ICI-treated cohort (Samstein et.al)

| Gene    | ZFHX3-MT | ZFHX3-WT | Gene-MT<br>(ZFHX3-MT) | Gene-MT<br>(ZFHX3-WT) | Pvalue<br>(Fisher's exact<br>test) |
|---------|----------|----------|-----------------------|-----------------------|------------------------------------|
| TP53    | 27       | 323      | 22                    | 195                   | 0.0377402                          |
| KRAS    | 27       | 323      | 11                    | 113                   | 0.537556                           |
| KEAP1   | 27       | 323      | 5                     | 65                    | 1                                  |
| STK11   | 27       | 323      | 5                     | 65                    | 1                                  |
| EGFR    | 27       | 323      | 2                     | 41                    | 0.554051                           |
| PTPRD   | 27       | 323      | 8                     | 35                    | 0.00999795                         |
| RBM10   | 27       | 323      | 5                     | 33                    | 0.194279                           |
| EPHA3   | 27       | 323      | 7                     | 30                    | 0.0152164                          |
| PTPRT   | 27       | 323      | 5                     | 30                    | 0.169837                           |
| SMARCA4 | 27       | 323      | 6                     | 29                    | 0.0402388                          |
| NF1     | 27       | 323      | 4                     | 30                    | 0.316448                           |
| FAT1    | 27       | 323      | 7                     | 26                    | 0.00785888                         |
| ARID1A  | 27       | 323      | 4                     | 26                    | 0.270864                           |
| EPHA5   | 27       | 323      | 2                     | 27                    | 1                                  |
| PIK3CG  | 27       | 323      | 3                     | 24                    | 0.451217                           |
| RB1     | 27       | 323      | 2                     | 23                    | 1                                  |
| BRAF    | 27       | 323      | 2                     | 22                    | 0.706476                           |
| PIK3CA  | 27       | 323      | 4                     | 20                    | 0.102006                           |
| ATM     | 27       | 323      | 1                     | 22                    | 1                                  |

Table S2. Comparison of gene mutations (top20) between the ZFHX3-MT and ZFHX3-WT tumors in the TCGA-NSCLC cohort

| Gene  | ZFHX3-MT | ZFHX3-WT | Gene-MT<br>(ZFHX3-MT) | Gene-MT<br>(ZFHX3-WT) | Pvalue<br>(Chi-Square<br>test) |
|-------|----------|----------|-----------------------|-----------------------|--------------------------------|
| TP53  | 60       | 941      | 46                    | 582                   | 0.030471446                    |
| TTN   | 60       | 941      | 45                    | 536                   | 0.009043                       |
| CSMD3 | 60       | 941      | 33                    | 364                   | 0.017833463                    |
| MUC16 | 60       | 941      | 33                    | 361                   | 0.015469991                    |
| RYR2  | 60       | 941      | 29                    | 334                   | 0.061874046                    |
| LRP1B | 60       | 941      | 26                    | 299                   | 0.086954139                    |
| USH2A | 60       | 941      | 27                    | 286                   | 0.026234347                    |
| ZFHX4 | 60       | 941      | 25                    | 269                   | 0.044362852                    |
| SPTA1 | 60       | 941      | 14                    | 210                   | 0.981284577                    |

|          |    |     |    |     |             |
|----------|----|-----|----|-----|-------------|
| XIRP2    | 60 | 941 | 19 | 199 | 0.079647264 |
| FLG      | 60 | 941 | 17 | 192 | 0.193120495 |
| SYNE1    | 60 | 941 | 17 | 191 | 0.185710325 |
| NAV3     | 60 | 941 | 14 | 184 | 0.585426419 |
| PCDH15   | 60 | 941 | 18 | 169 | 0.031616612 |
| FAM135B  | 60 | 941 | 16 | 169 | 0.130229559 |
| RYR3     | 60 | 941 | 19 | 165 | 0.010220667 |
| COL11A1  | 60 | 941 | 21 | 159 | 0.000760243 |
| CDH10    | 60 | 941 | 19 | 157 | 0.005419866 |
| PAPPA2   | 60 | 941 | 10 | 165 | 1           |
| ADAMTS12 | 60 | 941 | 8  | 166 | 0.497787291 |
