# Supplementary material
Source: PubMed Central journal article supplement (PMC10992006)

**A**

WT (66) MT (11)

WT (66) MT (11)

WT (62) MT (10)

WT (61) MT (10)

GDSC-NSCLC

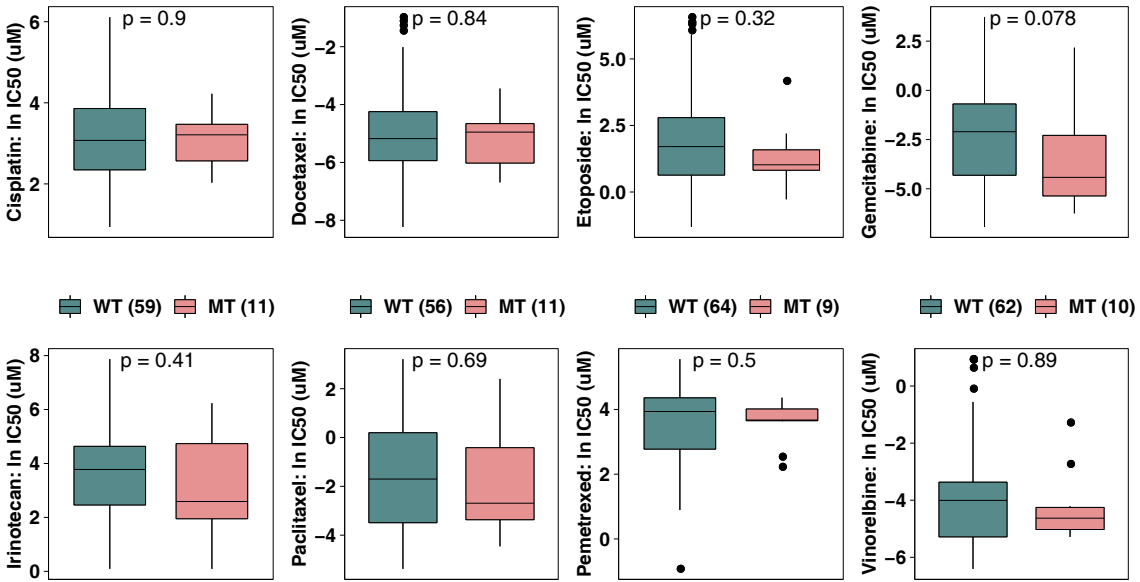**B**

WT (54) MT (8)

WT (54) MT (8)

WT (51) MT (7)

WT (50) MT (7)

GDSC-LUAD

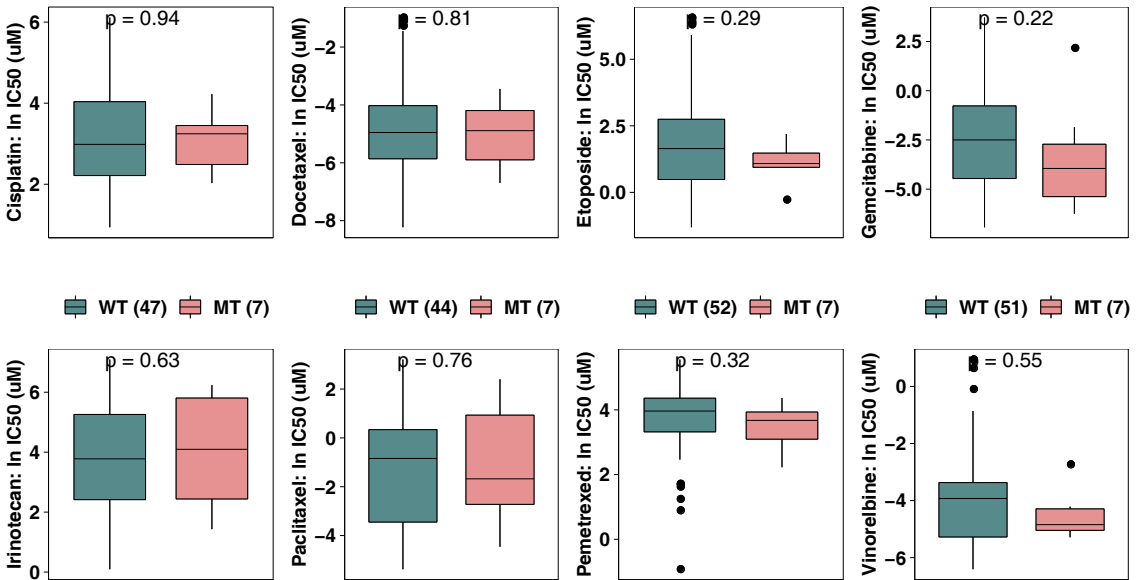**C**

WT (12) MT (3)

WT (12) MT (3)

WT (11) MT (3)

WT (11) MT (3)

GDSC-LUSC

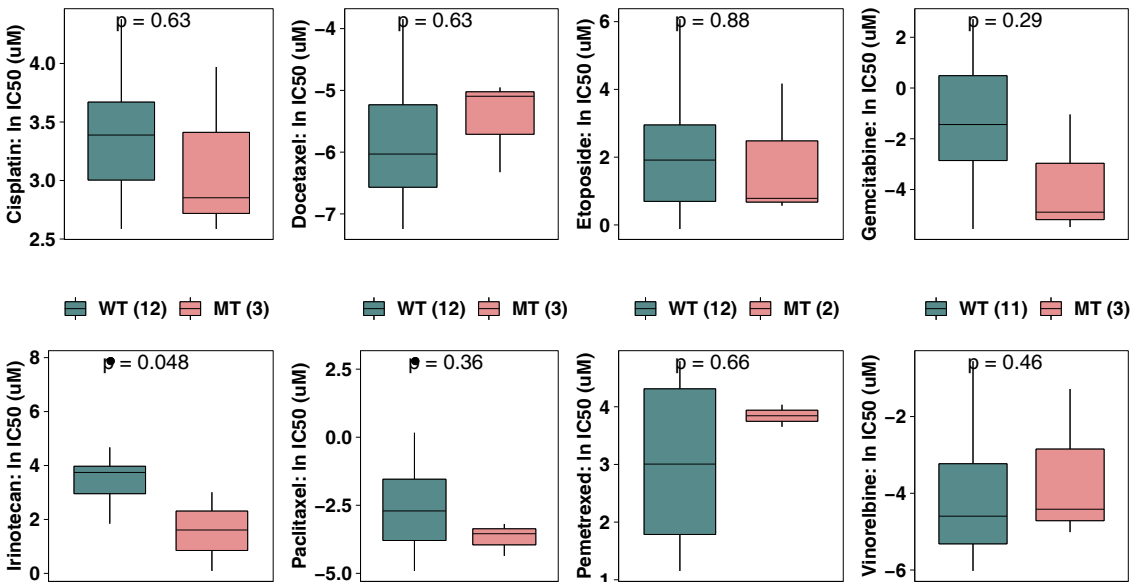

Supplement: 262_2020_2668_MOESM3_ESM.pdf [file 262_2020_2668_MOESM3_ESM.pdf]

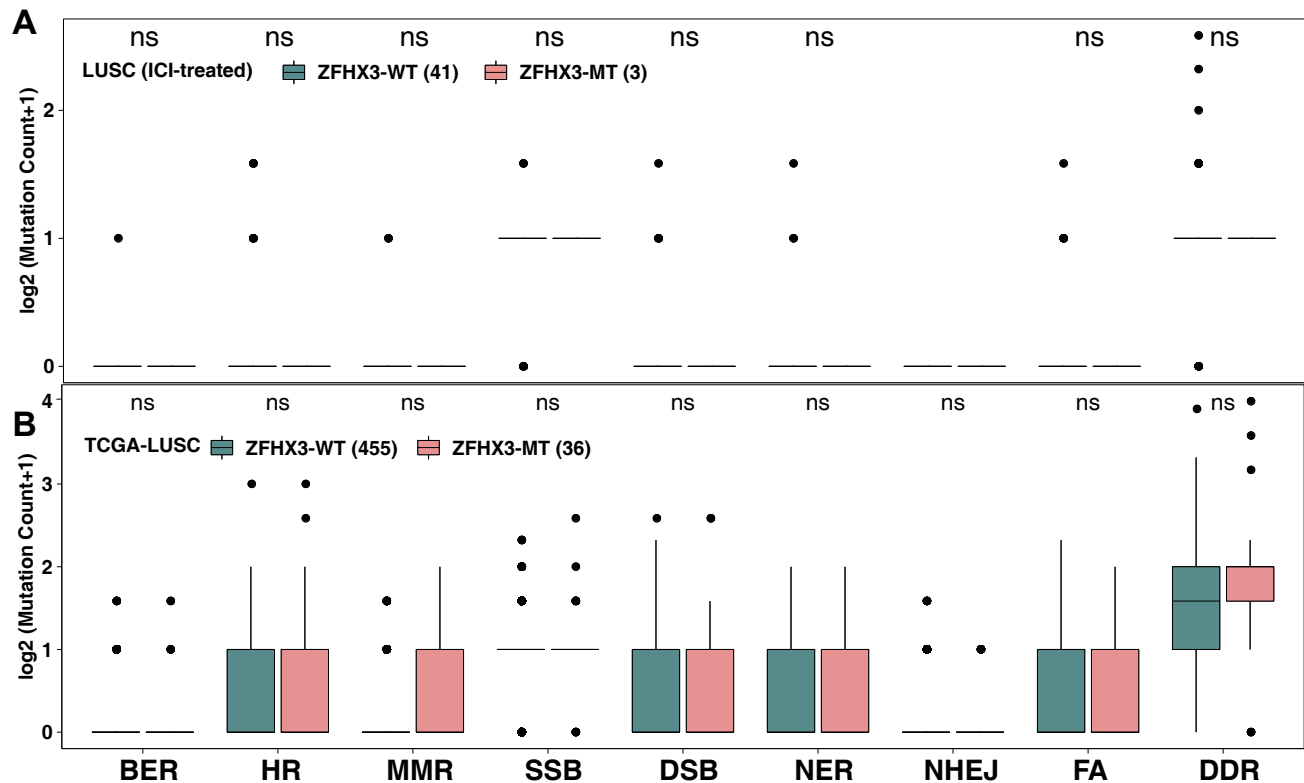

Supplement: 262_2020_2668_MOESM4_ESM.pdf [file 262_2020_2668_MOESM4_ESM.pdf]
